# Supplementary material
Source: PubMed Central journal article supplement (PMC7349129)

## Supplementary Online Content

Diefenhardt M, Ludmir EB, Hofheinz R-D, et al. Association of treatment adherence with oncologic outcome for patients with rectal cancer: a post hoc analysis of the CAO/ARO/AIO-04 phase 3 randomized clinical trial. *JAMA Oncol*. Published online July 9, 2020. doi:10.1001/jamaoncol.2020.2394

**eFigure 1.** Study Flow Diagram of the Present Post Hoc Analysis

**eFigure 2.** Prognostic Significance of Adjuvant Chemotherapy Compliance for Disease-Free Survival Based on Univariable Analysis in Patients That Received the Full Dose of nCRT for (A) Adjuvant 5-FU CT and (B) Adjuvant 5-FU/Ox CT

**eTable 1.** Association of Patient Characteristics With the Compliance to nCRT in the Two Treatment Groups

**eTable 2.** Univariable Analyses of nCRT Compliance and Pretreatment Characteristics on Disease-Free Survival in 5-FU and 5-FU/Ox Group

This supplementary material has been provided by the authors to give readers additional information about their work.

**eFigure 1.** Study Flow Diagram of the Present Post Hoc Analysis

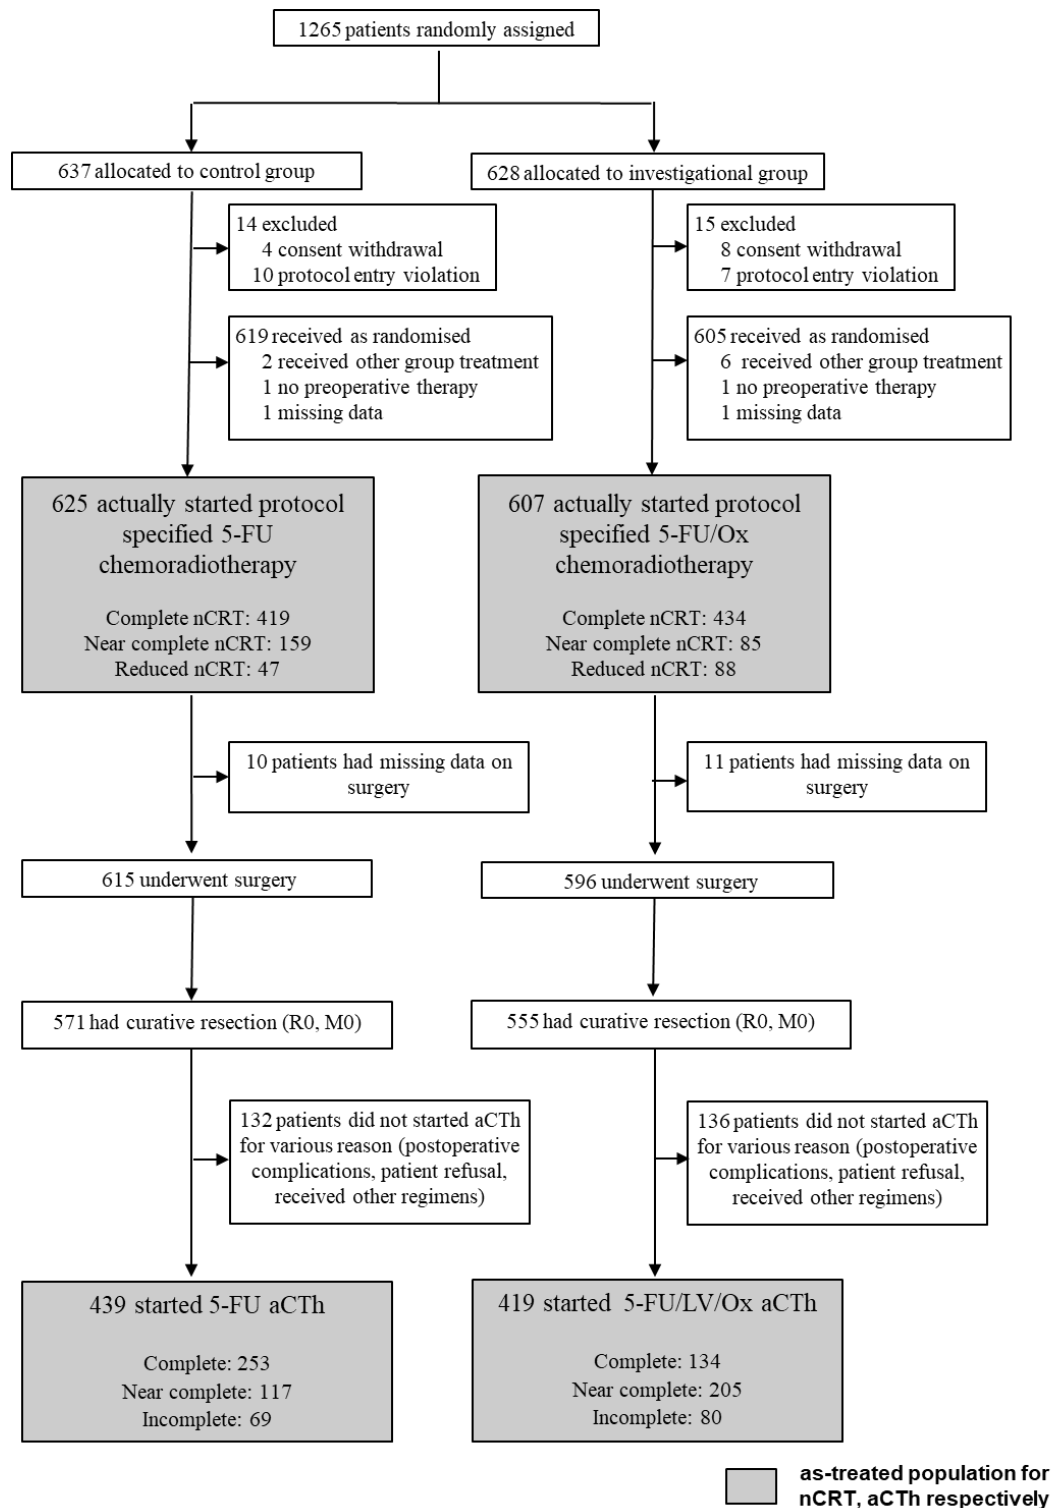

**eTable 1.** Association of Patient Characteristics With the Compliance to nCRT in the Two Treatment Groups

| Characteristics               | No. | 5-FU treatment group<br>N=625 |                          |                 | P-value      | No. | 5-FU/Ox treatment group<br>N=607 |                          |                 | P-value      |
|-------------------------------|-----|-------------------------------|--------------------------|-----------------|--------------|-----|----------------------------------|--------------------------|-----------------|--------------|
|                               |     | complete<br>nCRT              | near<br>complete<br>nCRT | reduced<br>nCRT |              |     | complete<br>nCRT                 | near<br>complete<br>nCRT | reduced<br>nCRT |              |
| <b>Number (%)</b>             | 625 | 419 (67.0%)                   | 159 (25.4%)              | 47 (7.5%)       |              | 607 | 434 (71.5%)                      | 85 (14.0%)               | 88 (14.5%)      |              |
| <b>Age</b>                    |     |                               |                          |                 |              |     |                                  |                          |                 |              |
| < 70 years                    | 470 | 326 (69.4%)                   | 108 (23.0%)              | 36 (7.7%)       |              | 465 | 338 (72.7%)                      | 67 (14.4%)               | 60 (12.9%)      |              |
| ≥ 70 years                    | 155 | 93 (60.0%)                    | 51 (32.9%)               | 11 (7.1%)       | <b>0.048</b> | 142 | 96 (67.6%)                       | 18 (12.7%)               | 28 (19.7%)      | 0.13         |
| <b>Gender</b>                 |     |                               |                          |                 |              |     |                                  |                          |                 |              |
| Male                          | 442 | 295 (66.7%)                   | 120 (27.1%)              | 27 (6.1%)       |              | 430 | 322 (74.9%)                      | 56 (13.0%)               | 52 (12.1%)      |              |
| Female                        | 183 | 124 (67.8%)                   | 39 (21.3%)               | 20 (10.9%)      | 0.06         | 177 | 112 (69.3%)                      | 29 (16.4%)               | 36 (20.3%)      | <b>0.01</b>  |
| <b>ECOG</b>                   |     |                               |                          |                 |              |     |                                  |                          |                 |              |
| Grade 0                       | 415 | 328 (79.0%)                   | 121 (25.4%)              | 28 (5.9%)       |              | 479 | 348 (72.7%)                      | 66 (13.8%)               | 65 (13.6%)      |              |
| Grade 1                       | 158 | 80 (61.1%)                    | 35 (26.7%)               | 16 (12.2%)      |              | 115 | 77 (67.0%)                       | 19 (16.5%)               | 19 (16.5%)      |              |
| Grade 2                       | 45  | 7 (70.0%)                     | 2 (20.0%)                | 1 (10.0%)       | 0.14         | 6   | 4 (66.7%)                        | 0 (0%)                   | 2 (33.3%)       | 0.42         |
| <b>BMI [kg/m<sup>2</sup>]</b> |     |                               |                          |                 |              |     |                                  |                          |                 |              |
| underweight<br>0-18.49        | 9   | 7 (77.8%)                     | 1 (11.1%)                | 1 (11.1%)       |              | 8   | 3 (37.5%)                        | 1 (12.5%)                | 4 (50.0%)       |              |
| normal weight<br>18.5-24.9    | 196 | 138 (70.4%)                   | 44 (22.4%)               | 14 (7.1%)       |              | 211 | 146 (69.2%)                      | 27 (12.8%)               | 38 (18.0%)      |              |
| Overweight<br>25-29.9         | 280 | 189 (67.5%)                   | 67 (23.9%)               | 24 (8.6%)       |              | 258 | 196 (76.0%)                      | 34 (13.2%)               | 28 (10.9%)      |              |
| Obese<br>≥30                  | 140 | 85 (60.7%)                    | 47 (33.6%)               | 8 (5.7%)        | 0.25         | 130 | 89 (68.5%)                       | 23 (17.7%)               | 18 (13.8%)      | <b>0.02</b>  |
| <b>cT</b>                     |     |                               |                          |                 |              |     |                                  |                          |                 |              |
| cT2                           | 32  | 18 (56.3%)                    | 12 (37.5%)               | 2 (6.3%)        |              | 22  | 12 (54.5%)                       | 7 (31.8%)                | 3 (13.6%)       |              |
| cT3                           | 540 | 363 (67.2%)                   | 135 (25.0%)              | 42 (7.8%)       |              | 543 | 401 (73.8%)                      | 67 (12.3%)               | 75 (13.8%)      |              |
| cT4                           | 49  | 34 (69.4%)                    | 12 (24.5%)               | 3 (6.1%)        | 0.61         | 41  | 20 (48.8%)                       | 11 (26.8%)               | 10 (24.4%)      | <b>0.001</b> |
| <b>cN</b>                     |     |                               |                          |                 |              |     |                                  |                          |                 |              |
| cN0                           | 158 | 99 (62.7%)                    | 42 (26.6%)               | 17 (10.8%)      |              | 145 | 100 (69.0%)                      | 26 (17.9%)               | 19 (13.1%)      |              |
| cN+                           | 454 | 309 (68.1%)                   | 116 (25.6%)              | 29 (6.4%)       | 0.17         | 447 | 321 (71.8%)                      | 59 (13.2%)               | 67 (15.0%)      | 0.35         |
| <b>Tumor Differentiation</b>  |     |                               |                          |                 |              |     |                                  |                          |                 |              |
| G1                            | 31  | 27 (87.1%)                    | 3 (9.7%)                 | 1 (3.2%)        |              | 33  | 22 (66.7%)                       | 354 (72.2%)              | 8 (24.2%)       |              |
| G2                            | 504 | 136 (64.7%)                   | 136 (27.0%)              | 42 (8.3%)       |              | 490 | 3 (9.1%)                         | 69 (14.1%)               | 67 (13.7%)      |              |
| G3                            | 50  | 34 (68.0%)                    | 13 (26.0%)               | 3 (6.0%)        | 0.15         | 49  | 8 (24.2%)                        | 9 (18.4%)                | 7 (14.3%)       | 0.42         |
| <b>Tumor Localisation</b>     |     |                               |                          |                 |              |     |                                  |                          |                 |              |

|        |  |     |             |            |            |             |     |             |            |            |      |
|--------|--|-----|-------------|------------|------------|-------------|-----|-------------|------------|------------|------|
| Low    |  | 216 | 147 (68.1%) | 58 (26.9%) | 11 (5.1%)  |             | 247 | 175 (70.9%) | 29 (11.7%) | 43 (17.4%) |      |
| Middle |  | 338 | 215 (63.6%) | 89 (26.3%) | 34 (10.1%) |             | 298 | 208 (69.8%) | 50 (16.8%) | 40 (13.4%) |      |
| High   |  | 64  | 53 (82.8%)  | 9 (14.1%)  | 2 (3.1%)   | <b>0.01</b> | 55  | 45 (81.8%)  | 6 (10.9%)  | 4 (7.3%)   | 0.11 |

Abbreviations: nCRT, neoadjuvant chemoradiotherapy; BMI, body mass index; 5-FU, 5-fluorouracil; Ox, oxaliplatin

**eTable 2.** Univariable Analyses of nCRT Compliance and Pretreatment Characteristics on Disease-Free Survival in 5-FU and 5-FU/Ox Group

| Univariable analysis                                   | 3-year DFS<br>5-FU nCRT group |                                           |                          | 3-year DFS<br>5-FU/Ox nCRT group |                                           |                      |
|--------------------------------------------------------|-------------------------------|-------------------------------------------|--------------------------|----------------------------------|-------------------------------------------|----------------------|
|                                                        | HR                            | 95% CI                                    | P-value                  | HR                               | 95% CI                                    | P-value              |
| <b>nCRT compliance</b>                                 |                               |                                           |                          |                                  |                                           |                      |
| Complete / near complete<br>/ reduced                  | 1.265<br><b>1.815</b>         | 0.922-1.737<br><b>1.142-2.885</b>         | 0.15<br><b>0.01</b>      | 1.478<br><b>1.835</b>            | 0.966-2.261<br><b>1.226-2.746</b>         | 0.07<br><b>0.003</b> |
| <b>Gender</b>                                          |                               |                                           |                          |                                  |                                           |                      |
| Male / Female                                          | 0.787                         | 0.570-1.086                               | 0.15                     | 1.013                            | 0.719-1.428                               | 0.94                 |
| <b>Age</b>                                             |                               |                                           |                          |                                  |                                           |                      |
| < 70 years / ≥ 70 years                                | 1.172                         | 0.856-1.606                               | 0.32                     | <b>1.613</b>                     | <b>1.149-2.265</b>                        | <b>0.006</b>         |
| <b>ECOG</b>                                            |                               |                                           |                          |                                  |                                           |                      |
| Grade 0 / Grade 1<br>/ Grade 2                         | <b>1.601</b><br>2.170         | <b>1.165-2.199</b><br>0.889-5.299         | <b>0.004</b><br>0.09     | <b>1.796</b><br>0.937            | <b>1.257-2.566</b><br>0.131-6.707         | <b>0.001</b><br>0.95 |
| <b>BMI [kg/m<sup>2</sup>]</b>                          |                               |                                           |                          |                                  |                                           |                      |
| Underweight / normal weight<br>/ overweight<br>/ obese | 0.806<br>0.236<br>0.260       | 0.253-2.567<br>0.236-2.359<br>0.260-2.688 | 0.72<br>0.62<br>0.76     | 0.516<br>0.577<br>0.419          | 0.161-1.651<br>0.182-1.831<br>0.127-1.377 | 0.27<br>0.35<br>0.15 |
| <b>cT-category</b>                                     |                               |                                           |                          |                                  |                                           |                      |
| cT2 / cT3<br>/ cT4                                     | 2.145<br><b>4.382</b>         | 0.881-5.223<br><b>1.682-11.413</b>        | 0.09<br><b>0.002</b>     | 0.889<br>1.399                   | 0.392-2.012<br>0.537-3.640                | 0.78<br>0.49         |
| <b>cN-category</b>                                     |                               |                                           |                          |                                  |                                           |                      |
| cN0 / cN+                                              | 0.792                         | 0.581-1.080                               | 0.14                     | 1.260                            | 0.857-1.851                               | 0.24                 |
| <b>Grading</b>                                         |                               |                                           |                          |                                  |                                           |                      |
| G1 / G2<br>/ G3                                        | 0.971<br>1.950                | 0.496-1.902<br>0.906-4.196                | 0.93<br>0.09             | 0.665<br>1.185                   | 0.348-1.270<br>0.551-2.549                | 0.22<br>0.66         |
| <b>Tumor Localisation</b>                              |                               |                                           |                          |                                  |                                           |                      |
| Low / Middle<br>/ High                                 | <b>0.583</b><br>0.930         | <b>0.432-0.787</b><br>0.592-1.461         | <b>&lt;0.001</b><br>0.75 | 1.161<br>1.063                   | 0.833-1.618<br>0.594-1.902                | 0.38<br>0.84         |

Abbreviations: nCRT, neoadjuvant chemoradiotherapy; 5-FU, 5-fluorouracil; Ox, oxaliplatin; CI, confidence interval; DFS, disease-free survival; HR, hazard ratio; Bold printed: significant  $P < 0.05$

**eFigure 2.** Prognostic Significance of Adjuvant Chemotherapy Compliance for Disease-Free Survival Based on Univariable Analysis in Patients That Received the Full Dose of nCRT for (A) Adjuvant 5-FU CT (complete vs near complete P = 0.77; complete vs incomplete P = 0.53) and (B) Adjuvant 5-FU/Ox CT (complete vs near complete P = 0.97; complete vs incomplete P = 0.65). Percentages refer to 3-year DFS [95% confidence interval, CI]).

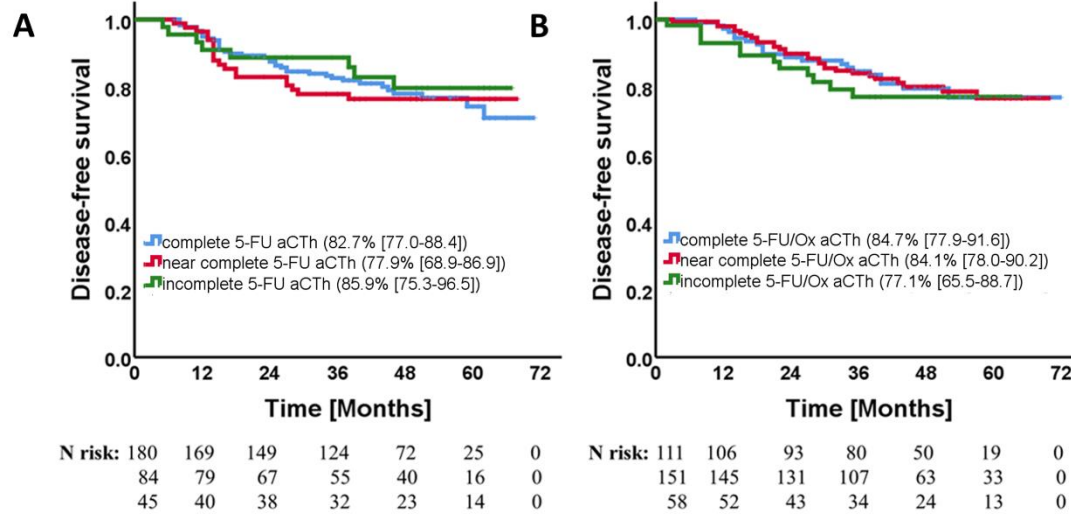

Supplement: jamaoncol-e202394-s002.pdf [file jamaoncol-e202394-s002.pdf]
